# Dissection of PRC1 and PRC2 recruitment in Arabidopsis connects EAR repressome to PRC2 anchoring

Fernando Baile<sup>a</sup>, Wiam Merini<sup>a</sup>, Inés Hidalgo, Myriam Calonje\*

Institute of Plant Biochemistry and Photosynthesis (IBVF-CSIC), Avenida Américo Vespucio 49, 41092, Seville, Spain.

<sup>a</sup>Co-first authors

\*Corresponding author email: [myriam.calonje@ibvf.csic.es](mailto:myriam.calonje@ibvf.csic.es)

**Short title:** The EAR acts as a docking point for PRC2 and HDACs

The author responsible for distribution of materials integral to the findings presented in this article in accordance with the policy described in the Instructions for Authors ([www.plantcell.org](http://www.plantcell.org)) is: Myriam Calonje ([myriam.calonje@ibvf.csic.es](mailto:myriam.calonje@ibvf.csic.es)).

## Abstract

PcG complexes ensure that every cell in an organism expresses the genes needed at a particular stage, time or condition. However, it is still not fully understood how PRC1 and PRC2 are recruited to target genes in plants. Recent results in Arabidopsis support that PRC2 recruitment is mediated by different TFs. However, it is unclear how all these TFs interact with PRC2 and whether they can also recruit PRC1 activity. Here, by using a system to *in vivo* bind selected factors to a synthetic promoter lacking the complexity of PcG target promoters, we show that while VAL1 binding recapitulates PRC1 and PRC2 marking, the binding of other TFs only render PRC2 marking. Interestingly, all these TFs contain an EAR domain that acts as docking point for PRC2 and HDACs, connecting two different repressive mechanisms. Furthermore, we show that different TFs act synergistically in PRC2 anchoring to maintain a long-term repression.

34

## 35 **Introduction**

36 The evolutionary conserved Polycomb group (PcG) factors are required to  
 37 maintain gene repression (Ringrose and Paro, 2004; Merini and Calonje, 2015).  
 38 These factors form multiprotein complexes with different histone modifying  
 39 activities, including PcG repressive complex 1 (PRC1), which has H2A E3  
 40 ubiquitin ligase activity towards lysine 119, 120 or 121 in *Drosophila*, mammals  
 41 or *Arabidopsis*, respectively (Wang et al., 2004; Cao et al., 2005; Bratzel et al.,  
 42 2010; Yang et al., 2013), and PRC2, which has H3 lysine 27 (H3K27)  
 43 trimethyltransferase activity (Müller et al., 2002; Makarevich et al., 2006;  
 44 Mozgova and Hennig, 2015). Despite the conserved activity of these  
 45 complexes, several data indicate that distinct rules operate for PcG recruitment  
 46 in the different organisms (Müller and Kassiss, 2006; Mendenhall et al., 2010;  
 47 Xiao et al., 2017).

48 In *Arabidopsis*, PRC2 core subunits are well conserved to their animal  
 49 counterpart (Mozgova et al., 2015); however, PRC1 composition is less  
 50 conserved (Merini and Calonje, 2015). Although a H2A E3 ubiquitin ligase  
 51 module containing one AtBMI1 (A, B or C) and one AtRING1 (A or B) protein  
 52 has been identified (Bratzel et al., 2010; Sanchez-Pulido et al., 2008), homologs  
 53 for other PRC1 components are missing and instead several plant-specific  
 54 proteins seem to play PcG functions (Merini and Calonje, 2015; Calonje, 2014).  
 55 Distribution analysis of H2AK121ub and H3K27me3 peaks in *Arabidopsis*  
 56 showed that both marks are generally targeted to gene regions, although  
 57 H3K27me3 peaks are longer than H2AK121ub peaks. In addition, this analysis  
 58 revealed that despite H2AK121ub marks frequently co-localize with H3K27me3,  
 59 there are also genes only marked with H3K27me3 or H2AK121ub (Zhou et al.,  
 60 2017).

61 Concerning PcG recruitment to target genes in *Arabidopsis*, a high number of  
 62 transcription factors (TFs) has been related to PRC2 tethering. Among these  
 63 factors are the GAGA motif binding proteins BASIC PENTACYSSTEINE (BPC) 1-  
 64 6 (Hecker et al., 2015a; Xiao et al., 2017), the *TELOBOX* motif binding proteins  
 65 *ARABIDOPSIS* ZINC FINGER 1 (AZF1), ZINC FINGER OF *ARABIDOPSIS*

66 THALIANA 6 (ZAT6) (Xiao et al., 2017) and TELOMERE-REPEAT-BINDING  
67 FACTOR (TRB)1/2/3 (Zhou et al., 2018), the MYB TF ASYMMETRIC LEAVES  
68 1 (AS1) (Lodha et al., 2013), the C2H2 TFs SUPERMAN (SUP) (Xu et al.,  
69 2018) and KNUCKLES (KNU) (Sun et al., 2019), and the MADS-box TFs  
70 FLOWERING LOCUS C (FLC) and SHORT VEGETATIVE PHASE (SVP)  
71 (Wang et al., 2014; Richter et al., 2019). Furthermore, it has been recently  
72 shown that certain genomic fragments located at several PcG targets, which  
73 contain binding sites for a wide variety of TF families, can recruit PRC2, thus,  
74 functioning as *Drosophila* Polycomb Recruiting Elements (PREs) (Xiao et al.,  
75 2017). In addition, localization analyses of H2AK121ub and H3K27me3 marks  
76 in WT and PcG mutants showed that levels of H3K27me3 are substantially  
77 reduced in the PRC1 mutant *atbmi1abc* (Zhou et al., 2017), indicating that  
78 PRC1 also plays a role in PRC2 recruitment.

79 Unlike PRC2, the recruitment of PRC1 H2A E3 ubiquitin ligase module has so  
80 far only been associated to VIVIPAROUS1/ABI3-LIKE (VAL)1/2 proteins (Yang  
81 et al., 2013; Qüesta et al., 2016), which is surprising given the number of TFs  
82 involved in PRC2 recruitment and the apparent dependence of PRC1 for  
83 H3K27me3 marking. Thus, despite recent advances in understanding PcG  
84 recruitment in plants, there are still many unknowns. For instance, it is still far  
85 from clear whether the recruitment of one complex is required for the  
86 recruitment of the other, how PRC2 can interact with such a diversity of TFs,  
87 and whether these interactions take place independently or in parallel. In  
88 addition, as there are genes marked with H2AK121ub/H3K27me3, H2AK121ub  
89 or H3K27me3 (Zhou et al., 2017), it is unknown whether this differential marking  
90 depends on different recruiting factors and, in that case, if these factors can  
91 function synergistically at some target genes.

92 To address all these questions, we developed a system to *in vivo* mediate the  
93 binding of selected factors to a synthetic promoter lacking the *cis* regulatory  
94 elements involved in PcG recruitment, allowing us to investigate their role under  
95 controlled conditions. Our results show that VAL1 can recapitulate PRC1 and  
96 PRC2 marking. However, while PRC1 recruitment is directly mediated by  
97 interaction with VAL1, PRC2 tethering involves both VAL1 and PRC1.  
98 Interestingly, we also found that PRC2 can be recruited independently of PRC1

99 by TFs from different families that contain an EAR domain as a common  
 100 feature. We show that the EAR domain, through its interaction with TOPLESS  
 101 (TPL)/TPL-RELATED (TPR)1-4 corepressors or the SIN3-associated protein 18  
 102 (SAP18), acts as a docking point for both PRC2 and HISTONE  
 103 DEACETHYLASE COMPLEXES (HDACs). Furthermore, we found that different  
 104 TFs could act synergistically in PRC2 recruitment, leading to increased levels of  
 105 H3K27me3 at target genes. Our results not only unveil how the different PcG  
 106 complexes are recruited to target genes, but also how different histone  
 107 modifying activities are coupled to promote gene repression in Arabidopsis.

108

109

## 110 Results

### 111 VAL1 acts as a platform for simultaneous recruitment of PRC1, PRC2 and 112 HDACs

113 VAL1/2 TFs have been involved in both PRC1- and PRC2-mediated repression  
114 (Yang et al., 2013; Qüesta et al., 2016; Chen et al., 2018; Jing et al., 2019;  
115 Zeng et al., 2020). VAL factors contain a B3 DNA-binding domain that  
116 specifically recognizes RY elements (CATGCA) (Suzuki et al., 2007).  
117 Accordingly, when analyzing the 6-mer DNA motifs present at the proximal  
118 promoter (500 bp upstream the start codon) of the genes marked with  
119 H2AK121ub/H3K27me3 in WT and upregulated in the PRC1 mutant *atbmi1abc*  
120 (Zhou et al., 2017) (n=1030), we found an enrichment of these elements over  
121 other motifs (**Figure 1A; Supplementary Dataset 1**). In addition, VAL1/2  
122 interact with HISTONE DEACETYLASES (HDAs)(Zeng et al., 2020; Zhou et al.,  
123 2013). Besides the B3 domain, VAL1/2 contain a Plant homeodomain like  
124 (PHD-L), a CW and an EAR domain(Suzuki and McCarty, 2008). While the  
125 PHD-L and the CW domains act as readers of H3 methylation states (Yuan et  
126 al., 2016; Hoppmann et al., 2011), the EAR domain is involved in the interaction  
127 with TPL/TRP or SAP18, which in turn recruit HDA activities (Kagale and  
128 Rozwadowski, 2011). Nevertheless, despite VAL1/2 can interact with these  
129 different repressive complexes, it is not clear whether these interactions take  
130 place simultaneously or within different contexts.

131 To investigate this, we developed a system to direct VAL1 recruitment to a  
132 constitutive promoter that lacks any of the *cis* regulatory element proposed to  
133 recruit PcG activity, including RY elements. For this, we built a synthetic target  
134 promoter, consisting on a *cauliflower mosaic virus* (*CaMV35S*) promoter in  
135 which the bacterial LexA *operator* (*LexO*) was inserted. This promoter was  
136 placed upstream of the *beta-glucuronidase* (*GUS*) reporter gene, obtaining the  
137 *pLexO::GUS* construct (**Figure 1B**). In parallel, we generated a construct to  
138 express a translational fusion between LexA DNA-binding domain (BD) and  
139 VAL1, and another to express the BD alone as control (**Figure 1B**). The three  
140 constructs were independently transformed into Wild type Col-0 Arabidopsis  
141 plants (WT) and, after selecting the appropriate lines (**Supplementary Figure**  
142 **1; Supplementary Figure 2**), they were crossed to obtain

143 WT/*pLexO::GUS/BD-VAL1* and WT/*pLexO::GUS/BD* plants. To verified the  
 144 functionality of the system, we confirmed the binding of the BD fusion proteins  
 145 to the synthetic promoter by Chromatin Immunoprecipitation (ChIP) using anti-  
 146 LexA BD antibody (**Figure 1C,D**). Next, we investigated whether H2AK121ub  
 147 and H3K27me3 marks were incorporated at the reporter *locus* in the different  
 148 plants. ChIP results using anti-H2AK121ub and anti-H3K27me3 antibodies  
 149 showed that the incorporation of these marks was only observed in  
 150 WT/*pLexO::GUS/BD-VAL1* (**Figure 2A,B**), indicating that the binding of VAL1 is  
 151 able to recapitulate PRC1 and PRC2 marking. We also checked the levels of  
 152 H3ac marks at the reporter *locus* in the different lines (**Figure 2C**), finding that  
 153 they were considerable decreased in WT/*pLexO::GUS/BD-VAL1* compared to  
 154 WT/*pLexO::GUS/BD* plants. In addition, we examined the effect of these  
 155 proteins on gene expression by measuring GUS activity in the different  
 156 transgenic plants (**Figure 2D**). While the binding of lexA BD did not affect the  
 157 levels of GUS activity compared to control plants, the binding of BD-VAL1 led to  
 158 a significant reduction of GUS activity. All together, these results indicate that  
 159 VAL1 acts as a platform for the simultaneous recruitment of different histone  
 160 modifying complexes involved in gene repression.

161 Previous reports have shown that VAL1 and AtBMI1 proteins directly interact  
 162 (Yang et al., 2013; Qüesta et al., 2016) and that the levels of H3K27me3 were  
 163 reduced in both *val1val2* and *atbmi1abc* mutants at seed maturation genes  
 164 (Yang et al., 2013). Furthermore, genome wide analyses showed that  
 165 H3K27me3 levels were reduced to some extent at most of  
 166 H2AK121ub/H3K27me3 marked genes in *atbmi1abc* (Zhou et al., 2017); thus,  
 167 we wondered whether VAL1 directly recruit PRC2 or if this is mediated by PRC1  
 168 interaction. To investigate this, we introduced the *pLexO::GUS* and *BD-VAL1*  
 169 transgenes into *atbmi1abc* mutant (**Figure 2E**, left panel) and analyzed the  
 170 levels of H3K27me3 at the reporter *locus* (**Figure 2E**, right panel). We found  
 171 that despite the levels of H3K27me3 marks were considerably reduced in  
 172 *atbmi1abc* mutant, they were not completely eliminated, indicating that PRC2  
 173 recruitment is mediated by both PRC1 and VAL1.

174

## 175 **PRC2-independent recruitment is mediated by TFs other than the VAL** 176 **factors**

177 A broad diversity of TFs belonging to different gene families are able to bind to  
178 PRE-like sequences in Arabidopsis (Xiao et al., 2017). Among the most  
179 enriched ones are the C2H2 and AP2-ERF families (Xiao et al., 2017) (**Figure**  
180 **3A**). Accordingly, several evidence showed that the C2H2 factors SUP, KNU  
181 and AZF1 are able to recruit PRC2 activity (Xiao et al., 2017; Xu et al., 2018;  
182 Sun et al., 2019). Besides, the MADS-box TFs FLC and SVP have been  
183 connected to PRC2 repression (Wang et al., 2014; Richter et al., 2019) (**Figure**  
184 **3A**). Therefore, we wondered whether all these TFs were able to work as  
185 recruiting platforms for PRC1, PRC2 and possibly other histone modifying  
186 complexes as VAL1 did. To test this, we generated BD-KNU, BD-FLC and BD-  
187 ERF10 fusions and analyzed their effects on our synthetic target *locus*. We  
188 found that the three fusion proteins were able to repress gene expression  
189 (**Figure 3B**) and led to the incorporation of H3K27me3 and the removal of H3ac  
190 marks (**Figure C,D**). However, we did not detect incorporation of H2AK121ub  
191 marks (**Figure 3E**). Accordingly, the *cis* regulatory motifs recognized by these  
192 TFs were enriched at the proximal promoter of the genes marked only with  
193 H3K27me3 (Zhou et al., 2017), whereas the RY elements were not enriched in  
194 this subset of genes (**Supplementary Figure 3; Supplementary Dataset 1**).  
195 These results indicate that PRC2 activity can be recruited independently of  
196 PRC1 through TFs other than VAL factors.

197 Nevertheless, since the promoters of H2AK121ub/H3K27me3 marked genes in  
198 addition to RY elements showed enrichment in other *cis* regulatory motifs  
199 (**Figure 1A; Supplementary Dataset 1**), we wondered whether different  
200 recruiting factors could collaborate in H3K27me3 marking at these genes. To  
201 test this, we inserted into the synthetic promoter a DNA fragment containing one  
202 GAGA and two *TELOBOX* motifs to generate the WT/*p(G+2T)LexO::GUS* line,  
203 as these motifs have been extensively related to PRC2 recruitment in  
204 Arabidopsis (Xiao et al., 2017; Zhou et al., 2018; Hecker et al., 2015b) (**Figure**  
205 **3F; Supplementary Figures 1 and 4**). We first analyzed the levels of  
206 H3K27me3 at *GUS* reporter *locus* in WT/*p(G+2T)LexO::GUS* and  
207 WT/*pLexO::GUS* plants in absence of any of the BD fusion proteins. We



208 detected some levels of H3K27me3 marks at the reporter *locus* when these  
209 motifs were present (**Figure 3G**), supporting that the TFs recognizing these  
210 motifs can mediate PRC2 recruitment. Then, we checked the levels of  
211 H3K27me3 at these reporter *loci* after the binding of BD-VAL1 (**Figure 3G**). We  
212 found higher levels of H3K27me3 in WT/*p(G+2T)LexO::GUS/BD-VAL1* than in  
213 WT/*p(G+2T)LexO::GUS*; moreover, the levels in WT/*p(G+2T)LexO::GUS/BD-*  
214 *VAL1* were higher than in WT/*pLexO::GUS/BD-VAL1*. Consistent with this, we  
215 found that GUS activity was lower in *p(G+2T)LexO::GUS/BD-VAL1* than in  
216 *pLexO::GUS/BD-VAL1* plants (**Figure 3H**), indicating that the levels of  
217 H3K27me3 are important to maintain gene repression. All together, these  
218 results support that different TFs can act synergistically in PRC2 recruiting.

219

## 220 **EAR repressome connects histone deacetylation and PRC2 marking**

221 Since all the TFs tested, including VAL1, were able to recruit PRC2 activity, we  
222 examined if they display some common feature. Interestingly, despite the lack  
223 of sequence homology among them, these TFs contain an EAR domain.  
224 Furthermore, except for the case of TRB factors, all the TFs that have been  
225 related to PRC2 recruitment before contain an EAR domain (**Figure 4A**). The  
226 EAR domain is defined as LxLxL, DLNxP, and DLNxxP. This domain has been  
227 found in a high number of TFs of different gene families with repressive activity,  
228 constituting what has been named the EAR repressome (Kagale et al., 2010).  
229 The EAR domain mediates interaction with TPL/TPR corepressors or SAP18  
230 protein (Kagale and Rozwadowski, 2011; Causier et al., 2012; Song and  
231 Galbraith, 2006). TPL/TPR in addition interact with the HDAs HDA6 and  
232 HDA19(Liu et al., 2014), and, importantly, with the PcG proteins EMBRYONIC  
233 FLOWER1 (EMF1) and VERNALIZATION 5 (VRN5) (Causier et al., 2012; Ke et  
234 al., 2015; Collins et al., 2019). On the other hand, SAP18 is both a component  
235 of the SIN3-HDAC (Zhang et al., 1997) and the APOPTOSIS AND SPLICING-  
236 ASSOCIATED PROTEIN (ASAP) complex (Deka and Singh, 2017). The SIN3-  
237 HDAC in Arabidopsis includes a SIN3-like protein (SNL1-6), SAP18, SAP30,  
238 one HDA activity (HDA19, HDA9, HDA7 or HDA6) and MULTICOPY  
239 SUPPRESSOR OF IRA1 (MSI1)(Liu et al., 2014). Interestingly, MSI1 is also a  
240 PRC2 core component (Derkacheva et al., 2013; Mehdi et al., 2016; Ning et al.,



2019). Moreover, it has been shown that SAP18 co-purifies with PRC2 core components and HDA19 (Qüesta et al., 2016). All together, these data strongly suggest a direct connection between EAR factors, TPL/TPR-HDAC or SAP18-HDAC and PRC2, which so far has not been deeply investigated. Therefore, to explore whether the EAR domain can serve as a docking point for both PRC2 and HDAC recruitment via TPL/TPR or SAP18 interaction, we compared the levels of H3K27me3 marks and H3ac at the reporter *locus* after the binding of BD-KNU or a mutated BD-KNU version in which the EAR domain was removed (BD-KNU(-EAR)) (**Figure 4B,C**). We found that the levels of H3K27me3 were significantly reduced in *pLexO::GUS/BD-KNU(-EAR)* plants compared to *WT/pLexO::GUS/BD-KNU* plants, while the opposite effect was observed for the case of H3ac. Furthermore, the levels of GUS activity in *pLexO::GUS/BD-KNU(-EAR)* were as in control plants (**Figure 4D**). To further verify these results, we checked if the LexA BD fused to an EAR domain (BD-EAR) was able to reduce H3ac, increase H3K27me3 levels and repress gene expression when recruited to the synthetic promoter. Indeed, we found that the EAR domain by itself was able to cause all these effects (**Figure 4E,F,G**); however, it was unable to recruit PRC1 (**Figure 4H**), which connects the EAR repressome to PRC2 recruitment.

## 261 **EMF1-TPL interaction couples H3K27me3 marking to H3 deacetylation**

We also used our system to investigate the exact role of the plant-specific PcG associated factor EMF1 (Calonje et al., 2008). EMF1 has been proposed to be a PRC1 component due to its ability to *in vitro* perform similar functions to those of *Drosophila* Psc and to interact with AtBMI1 proteins (Bratzel et al., 2010; Calonje et al., 2008; Beh et al., 2012). However, several data indicate that EMF1 is required for H3K27me3 marking at some PcG target genes (Calonje et al., 2008; Kim et al., 2012; Li et al., 2018). Accordingly, EMF1 interacts with MSI1 (Calonje et al., 2008) and co-purifies with PRC2 components (Liang et al., 2015). In addition, EMF1 interacts with FLC and the HISTONE DEMETHYLASE JM14 to mediate *FT* repression (Wang et al., 2014). However, it is not clear whether EMF1 is also required for PRC1 marking. Thus, we analyzed the levels of H3K27me3 and H2AK121ub at the reporter *locus* after the binding of BD-

274 EMF1 to the synthetic promoter (**Figure 5A**). We found that the levels of  
 275 H3K27me3 were increased in WT/*pLexO::GUS/BD-EMF1* compared to  
 276 WT/*pLexO::GUS/BD* plants but we did not find considerable changes in  
 277 H2AK121ub levels, indicating that the recruitment of EMF1 leads to H3K27me3  
 278 marking but not to H2AK121 monoubiquitination. Since EMF1 directly interact  
 279 with JM14 (Wang et al., 2014), we also analyzed H3K4me3 levels at the  
 280 reporter *locus* (**Figure 5B**). Accordingly, we found reduced levels of these  
 281 marks after BD-EMF1 binding. On the other hand, EMF1 has been shown to  
 282 interact with TPL in yeast two hybrid assay (Causier et al., 2012). In support of  
 283 this, we found TPL among the proteins that co-immunoprecipitate with EMF1  
 284 (Bloomer et al., 2020) (**Supplementary Dataset 2**). Furthermore, the levels of  
 285 H3ac at the reporter *locus* were reduced after EMF1 binding (**Figure 5B**),  
 286 confirming an EMF1-TPL-HDA interaction. We then analyzed the levels of GUS  
 287 activity in WT/*pLexO::GUS/BD-EMF1* (**Figure 5C**), finding decreased levels  
 288 compared to control plants; however, the levels were not as low as after the  
 289 binding of the TFs, indicating that factor/s acting upstream EMF1 may be  
 290 required for proper repression.

291

292

## 293 Discussion

294 PcG complexes ensure that each cell in an organism expresses the genes that  
295 are needed at a particular stage, time or condition. However, as PcG proteins  
296 do not have the ability to recognize DNA sequences, how PRC1 and PRC2 are  
297 recruited to the appropriate target gene is still not fully understood. Recent data  
298 support that PRC2 is recruited via interaction with different TFs; however, it is  
299 not known whether these TFs display a common feature to do so, whether the  
300 same TF can recruit PRC2 and PRC1 and how PcG-mediated differential  
301 marking is achieved. In this work, we were able to dissect how PRC1 and PRC2  
302 recruitment take places in Arabidopsis.

303 We found that the binding of VAL1 TF was able to recapitulate PRC1 and PRC2  
304 marking and to assemble HDAC activities, acting as a recruiting platform for  
305 different repressive complexes (**Figure 5D**, left panel). While PRC1 recruitment  
306 is mediated by AtBMI1 direct interaction with VAL1 (Yang et al., 2013; Qüesta  
307 et al., 2016), PRC2 recruitment involves both PRC1 and VAL1. Interestingly,  
308 our data showed that while TFs like KNU, FLC or ERF10 can mediate PRC2  
309 and HDACs recruitment, they cannot attract PRC1 for H2A monoubiquitination  
310 (**Figure 5D**, right panel), indicating that PRC2 recruitment relies on a more  
311 general mechanism.

312 When comparing the protein domains present in VAL1, KNU, FLC, ERF10 and  
313 other TFs related to PRC2 recruitment before, we found that, except for the  
314 case of TRB1/2/3 factors that seem to be stable PRC2-accessory proteins as  
315 they co-purify with PRC2 (Bloomer et al., 2020), all of these TFs contain an  
316 EAR domain. The EAR domain interacts with TPL/TPR or SAP18, which in turn  
317 recruit HDA activities (Kagale and Rozwadowski, 2011; Kagale et al., 2010;  
318 Causier et al., 2012; Song and Galbraith, 2006). Interestingly, TPL and SAP18  
319 also interact with PcG proteins. In fact, TPL co-purify with EMF1 (Bloomer et al.,  
320 2020) and SAP18 with MSI1 (Mehdi et al., 2016), suggesting that they serve as  
321 scaffolds for HDACs and PRC2 assembly. In support of this, we found that the  
322 binding of three EAR-containing TFs led to the incorporation of H3K27me3 and  
323 removal of H3ac marks at the reporter *locus*, and that this depends on the EAR  
324 domain. Moreover, the recruitment of EMF1 leads to H3K27me3 incorporation

325 and H3ac removal. Therefore, we propose that the EAR repressome acts as  
326 anchoring point for PRC2 and HDACs recruitment (**Figure 5**).

327 It is unknown whether the interaction of the EAR factors with TPL/TRP or  
328 SAP18 depends on the type of EAR domain or on adjacent sequences, or  
329 whether they functionally overlap, as some of the EAR factors have been  
330 reported to interact with both (Kagale and Rozwadowski, 2011; Kagale et al.,  
331 2010; Causier et al., 2012). In any case, since TPL/TRP and SAP18 are  
332 expressed in most plant tissues (Kagale and Rozwadowski, 2011), the ability of  
333 the PcG machinery to maintain specific transcriptional states in different cell  
334 types, at different times or under different conditions, may rely on the EAR-  
335 containing recruiting factors, which expression is tightly regulated in response to  
336 internal and external signals.

337 We also found that different TFs can act synergistically in PRC2 recruitment at  
338 the same target gene, leading to increased levels of H3K27me3. PcG proteins  
339 in plants seems to be involved in both transient and long-term repression that  
340 persist through multiple cell divisions. Long-term repression has been reported  
341 to require spreading and maintenance of high levels of H3K27me3 marks  
342 across the target genes (Costa and Dean, 2019). Interestingly, *FLC* initial  
343 repression requires the RY elements for PcG nucleation (Costa and Dean,  
344 2019), but its long-term repression involves other *cis* regulatory sequences  
345 located along *FLC locus* (Qüesta et al., 2020). Similarly, a PcG long-term  
346 repression in *Drosophila* requires sequence-specific targeting of PRC2 (Laprell  
347 et al., 2017). Thus, it might be possible that the combined action of different  
348 recruiting factors propagates and maintains appropriate H3K27me3 levels to  
349 mediate long-term repression in *Arabidopsis*.

350 Nevertheless, in *Arabidopsis* there is also a high number of only-H2AK121ub  
351 marked genes<sup>16</sup>. The promoters of these genes are highly enriched in G-box  
352 motifs (**Supplementary Figure 3; Supplementary Dataset 1**). This motif is  
353 recognized by two large families of TFs in *Arabidopsis*, the basic helix-loop-helix  
354 (bHLH) and Leu zipper (bZIP) families (Ezer et al., 2017), raising the possibility  
355 that TFs from these families may be involved in PRC1-independent recruitment

356 and suggesting that PcG differential marking depends on different recruiting  
357 factors.

358

359

## 360 **Methods**

### 361 **Plant material and culture conditions**

362 *Arabidopsis thaliana* Col-0 wild type (WT), *atbmi1abc* (Yang et al., 2013) and  
363 transgenic plants harboring the different constructs were grown under long-day  
364 conditions (16 h light and 8 h dark) at 21 °C on MS agar plates containing 1.5%  
365 sucrose and 0.8% agar for 7 days. MS-agar plates were appropriately  
366 supplemented with Kanamycin (50 µg.ml<sup>-1</sup>) and/or hygromycin (10 µg.ml<sup>-1</sup>) for  
367 selection of transgenic plants.

### 368 **Synthetic system constructs and transgenic plants**

369 To generate the synthetic target gene constructs, we used as backbone the  
370 pCambia 1305.1 binary vector that contains the *GUS reported gene* under the  
371 control of the *cauliflower mosaic virus* (CaMV35S) promoter. We replaced the  
372 CaMV35S promoter by a CaMV35S in which the LexA DNA binding element  
373 (Lex A operator (LexO), amplified from pER8 vector (Zuo et al., 2000), was  
374 inserted upstream of the TATA box, resulting in the *pLexO::GUS* construct. To  
375 generate *p(G+2T)LexO::GUS* construct, a DNA fragment of 100 bp from the  
376 regulatory region of *ABSCISIC ACID INSENSITIVE 3 (ABI3)* gene (see  
377 **Supplementary Figure 4**), which contains one GAGA and two TELOBOX  
378 motifs, was introduced into the synthetic promoter upstream of the LexO. These  
379 constructs were transformed into WT Col-0 plants to generate WT/*pLexO::GUS*  
380 and WT/*p(G+2T)LexO::GUS* transgenic plants. To build the BD translational  
381 fusion constructs, we inserted into the pPZP211 vector the G10-90 promoter,  
382 the LexA BD (252 bp N-terminal region of LexA protein amplified from pER8  
383 vector (Zuo et al., 2000)), the TF cDNA and the OCTOPINE SYNTHASE (OCS)  
384 terminator . To construct the BD-EAR fusion, we used the C-terminal region of  
385 VAL1 cDNA that contains a predicted Nuclear Localization Signal (NLS) and the  
386 EAR domain (region from 2041 bp to stop codon of VAL1 cDNA; See  
387 **Supplementary Figure 5**). To ensure that the BD when expressed alone was  
388 transported to the nucleus, the sequence corresponding to VAL1 predicted NLS  
389 (region from 2041 to 2183 bp of VAL1 cDNA; See **Supplementary Figure 5**)  
390 was fused to the C-terminal region of the BD. The different BD fusion constructs  
391 were transformed into WT Col-0 plants. The expression of the protein in the  
392 different transgenic lines was verified by Western blot using anti-LexA BD

antibody. One line from each BD fusion was crossed to the same WT/*pLexO::GUS* or WT/*p(G+2T)LexO::GUS* line. Primers used are listed in **Supplementary Dataset 3**.

### **Western blot assay**

Total protein extract from the different plants was separated on 10% SDS-PAGE gel and transferred to a PVDF membrane (Immobilon-P Transfer membrane, Millipore) by semi-dry blotting in 25 mM Tris-HCl, 192 mM glycine, and 10% methanol. To detect the fusion proteins, anti-LexA BD antibody (Millipore 06-719; 1:2000) was used as primary antibody and Horseradish peroxidase-conjugated goat anti-rabbit (Sigma-Aldrich, A0545; 1:10,000) as secondary. Chemiluminescence detection was performed with ECL Prime Western Blotting Detection Reagent (GE Healthcare Life Sciences) following the manufacturer's instructions.

### **Fluorometric assay of beta-glucuronidase (GUS) activity**

The activity of beta-glucuronidase (GUS) was determined on whole seedlings using 4-methylumbelliferyl  $\beta$ -D-glucuronide (4-MUG) as a substrate (Halder and Kombrink, 2015). One-Single 7-day-old seedlings were placed in 96-well microplates and incubated with 150  $\mu$ L lysis buffer (50 mM sodium phosphate, pH 7.0, 10 mM EDTA, 0.1% Triton X-100) containing 1mM 4-MUG at 37°C for 90 min. At the end of the incubation period, 50  $\mu$ L of 1M Na<sub>2</sub>CO<sub>3</sub> (stop solution) was added to each well and 4-MU fluorescence was directly determined in a microplate reader (excitation/emission wavelength of 365/455 nm). Activity is expressed as relative fluorescence units (RFU).

### **Chromatin immunoprecipitation (ChIP) and ChIP-qPCR**

ChIP experiments were performed on one gr of 7-day-old whole seedlings fixed in 1% Formaldehyde. Chromatin was extracted from fixed tissue and fragmented using a Bioruptor® Pico (Diagenode) in fragments of 200-500 bp. The sheared chromatin was immunoprecipitated overnight using the following antibodies and dilutions: anti-LexA BD (Millipore 06-719, 1:300) Anti-H3K27me3 (Millipore, 07-449, 1:300), anti-H2AK121ub (Cell Signaling, 8240S; 1:100) Anti-Histone H3 (acetyl K9 + K14 + K18 + K23 + K27) (Abcam ab47915, 1:300), or anti-H3K4me3 (Diagenode, C15410003-50; 1:300). Immunocomplexes were



captures using Protein-A Sepharose beads CL-4B (GE Healthcare). After washing the Protein-A beads, chromatin was eluted and the cross-linking was reversed overnight at 65°C. The DNA from the immunoprecipitated chromatin was treated with RNase and proteinase K and purified by phenol-chloroform extraction followed by ethanol precipitation. For ChIP-qPCR, amplification was performed using SensiFAST™ SYBR® & Fluorescein Kit (Bioline) and iQ5 Biorad system. Results are given as percentage of input or as relative level to *FLOWERING LOCUS C (FLC)*, *ACTIN 7 (ACT7)* or *AGAMOUS (AG)*, depending on the histone mark and the genotype. qPCR data are shown as the means of two to four biological replicates as indicated. Primers used for ChIP-qPCR are listed in **Supplementary Dataset 3**.

436

### 437 **Author Contributions and Acknowledgements**

438 FB and WM performed the experiments with the help of IH. MC designed the study, interpreted the results and wrote the manuscript.

440 This work is supported by BIO2016-76457-P, PID2019-106664GB-I00 Grants from Spanish Ministry of Science and innovation. IH was supported by a Spanish National Research Council (CSIC) training scholarship (JAEINT2018-EX-0821).

444

### 445 **Competing Interests statement**

446 The authors declare that they have no competing interests.

447

### 448 **Figure legends**

449 **Figure 1. LexA BD fusion proteins *in vivo* bind to the synthetic promoter.**

450 **(A)** Bar chart showing RY element as the most significantly enriched cis-regulatory motif found at the proximal promoter of the H2AK121ub/H3K27me3 marked genes in WT that become upregulated in *atbmi1abc* mutant (n=1030 genes; see Supplementary Dataset 1). Analysis was carried out using Tair Motif finder tool (<https://www.arabidopsis.org/tools/bulk/motiffinder/index.jsp>). Other significantly enriched 6-mer motifs are also shown. **(B)** Schematic representation of the synthetic *GUS* reporter locus. The LexO element

457 recognized by LexA binding domain (BD) is indicated. Numbered arrows  
458 indicate the position of the primer pairs used to examine the binding of the  
459 fusion proteins to the synthetic *locus*. **(C,D)** Bar charts showing BD (in blue) and  
460 DB-VAL1 (in orange) enrichment at *GUS* reporter *locus* determined by ChIP  
461 using anti-LexA DB antibody. WT/*pLexO::GUS* plants (in grey) were used as  
462 negative control. Results are indicated as percentage of input. Error bars  
463 represent standard deviation of n=2-3 biological replicates. Significant  
464 differences as determined by Student's t-test are indicated (\*\*P < 0.001).

465 **Figure 2. VAL1 acts as a platform for PRC1, PRC2 and HDACs recruitment.**

466 **(A,B,C)** H2AK121ub, H3K27me3 and H3ac levels at *GUS* reporter *locus* in  
467 WT/*pLexO::GUS/BD* and WT/*pLexO::GUS/BD-VAL1* plants. Numbers at x-axis  
468 indicate the position of amplified regions as indicated in Figure 1b. H2AK121ub  
469 and H3K27me3 levels were normalized to *FLC* and H3ac levels to *ACT7*. Error  
470 bars indicate standard deviation of n=2-4 biological replicates. Significant  
471 differences at position 4 are indicated as determined by Student's t-test (\*\*P <  
472 0.001; \*P < 0.05). **(D)** Box plots showing GUS activity levels in  
473 WT/*pLexO::GUS*, WT/*pLexO::GUS/BD* and WT/*pLexO::GUS/BD-VAL1*  
474 seedlings at 7 DAG. RFU indicates relative fluorescence units. Activity was  
475 tested in independent seedlings (N≥17). In each case, the median (segment  
476 inside rectangle), the mean (cross inside the rectangle), upper and lower  
477 quartiles (boxes), and minimum and maximum values (whiskers) are indicated.  
478 Significant differences as determined by Student's t-test are indicated (\*\*P <  
479 0.001). “ns” indicates not significant. **(E)** Left panel, schematic representation of  
480 the experiment showed at the right panel in which the levels of H3K27me3 at  
481 the reporter *locus* were compared between WT/*pLexO::GUS/BD-VAL1* and  
482 *atbmi1abc/pLexO::GUS/BD-VAL1* plants. H3K27me3 levels were normalized to  
483 *FLC*. Error bars indicate standard deviation of n=2 biological replicates.  
484 Significant difference at position 4 is indicated as determined by Student's t-test  
485 (\*\*P < 0.01).

486 **Figure 3. BD-KNU, BD-FLC and BD-ERF10 are able to recruit PRC2 and**

487 **HDACs but not PRC1. (A)** Sequence logos of the cis regulatory motifs  
488 recognized by C2H2, MADS and AP2ERF TFs. **(B)** Box plots showing GUS  
489 activity levels in WT/*pLexO::GUS*, WT/*pLexO::GUS/BD*, WT/*pLexO::GUS/BD-*

490 *KNU*, WT/*pLexO::GUS/BD-FLC* and WT/*pLexO::GUS/BD-ERF10* seedlings at 7  
 491 DAG indicated as relative fluorescence units (RFU). Activity was tested in  
 492 independent seedlings (N≥18). In each case, the median (segment inside  
 493 rectangle), the mean (cross inside the rectangle), upper and lower quartiles  
 494 (boxes), and minimum and maximum values (whiskers) are indicated.  
 495 Significant differences as determined by Student's t-test are indicated (\*\*P <  
 496 0.001). **(C,D,E)** H3K27me3, H3ac and H2AK121ub levels at *GUS* reporter *locus*  
 497 in the different plants. Numbers at x-axis indicate the position of amplified  
 498 regions as indicated in Figure 1b. H3K27me3 and H2AK121ub levels were  
 499 normalized to *FLC*, and H3ac levels to *ACT7*. Error bars indicate standard  
 500 deviation of n=2 biological replicates. Significant differences compared to  
 501 WT/*pLexO::GUS/BD* are indicated as determined by Student's t-test (\*\*P <  
 502 0.001; \*P < 0.05). “ns” indicates not significant. One replicate of  
 503 WT/*pLexO::GUS/BD-VAL1* was included as additional control. **(F)** Schematic  
 504 representation of *p(G+2T)LexO::GUS* construct in which one GAGA and two  
 505 *TELOBOX* motifs were inserted upstream of the *LexO*. **(G)** H3K27me3 levels at  
 506 *GUS* reporter *locus* in WT/*pLexO::GUS* and WT/*p(G+2T)LexO::GUS* plants  
 507 with and without BD-VAL1. H3K27me3 levels were normalized to *FLC*. Error  
 508 bars indicate standard deviation of n=2 biological replicates. Significant  
 509 differences compared to WT/*pLexO::GUS* at position 4 are indicated as  
 510 determined by Student's t-test (\*\*P < 0.001; \*P < 0.01). **(H)** Box plots showing  
 511 *GUS* activity levels in the same plants. Activity was tested in N=14 independent  
 512 seedlings. Significant differences as determined by Student's t-test are indicated  
 513 (\*\*P < 0.001; \*P < 0.01).

#### 514 **Figure 4. EAR domain acts as an anchoring point for PRC2 and HDACs.**

515 **(A)** Schematic representation of the domains present at TFs related to PRC2  
 516 recruitment. The TFs analyzed in this work are indicated. **(B,C)** Comparison of  
 517 H3K27me3 and H3ac levels at *GUS* reporter *locus* in WT/*pLexO::GUS/BD-KNU*  
 518 and WT/*pLexO::GUS/BD-KNU(-EAR)* plants. WT/*pLexO::GUS/BD* plants are  
 519 included as control. Numbers at x-axis indicate the position of amplified regions  
 520 as indicated in Figure 1b. H3K27me3 levels were normalized to *FLC* and H3ac  
 521 levels to *ACT7*. Error bars indicate standard deviation of n=2 biological  
 522 replicates. Significant differences at position 4 are indicated as determined by

Student's t-test (\*\*P < 0.01; \*P < 0.05). **(D)** Box plots showing GUS activity levels in WT/*pLexO::GUS/BD*, WT/*pLexO::GUS/BD-KNU* and WT/*pLexO::GUS//BD-KNU(-EAR)* seedlings at 7 DAG indicated as relative fluorescence units (RFU). Activity was tested in independent seedlings (N≥12). The median (segment inside rectangle), the mean (cross inside the rectangle), upper and lower quartiles (boxes), and minimum and maximum values (whiskers) are indicated. Significant differences as determined by Student's t-test are indicated (\*\*\*P < 0.001). **(E,F)** Comparison of H3K27me3 and H3ac levels at *GUS* reporter locus in WT/*pLexO::GUS*, WT/*pLexO::GUS/BD* and WT/*pLexO::GUS//BD-EAR* plants. H3K27me3 levels were normalized to *FLC*, and H3ac levels to *ACT7*. Error bars indicate standard deviation of n=2 biological replicates. Significant differences between BD and BD-EAR are indicated as determined by Student's t-test (\*\*\*P < 0.001; \*P < 0.05). “ns” indicates not significant. **(G)** Box plots showing GUS activity levels in the same plants indicated as relative fluorescence units (RFU). Activity was tested in independent seedlings (N≥15). Significant differences as determined by Student's t-test are indicated (\*\*\*P < 0.001). **(H)** H2AK121ub levels at the reporter locus in the different plants. H2AK121ub levels were normalized to *FLC*. Error bars indicate standard deviation of n=2 biological replicates.

**Figure 5. EMF1 recruitment leads to the incorporation of H3K27me3 and removal of H3K4me3 and H3ac.** **(A)** H3K27me3 and H2AK121ub levels at *GUS* reporter locus in WT/*pLexO::GUS*, WT/*pLexO::GUS/BD* and WT/*pLexO::GUS/BD-EMF1* plants. Numbers at x-axis indicate the position of amplified regions as indicated in Figure 1b. H2AK121ub and H3K27me3 levels were normalized to *FLC*. Error bars indicate standard deviation of n=2 biological replicates. Significant differences compared to WT/*pLexO::GUS/BD* are indicated as determined by Student's t-test (\*\*\*P < 0.001). “ns” indicates not significant. **(B)** H3K4me3 and H3ac levels at *GUS* reporter locus in the different plants. The levels were normalized to *ACT7*. Error bars indicate standard deviation of n=2 biological replicates. Significant differences between BD and BD-EMF1 are indicated as determined by Student's t-test (\*\*P < 0.01). **(C)** Box plots showing GUS activity levels in WT/*pLexO::GUS*, WT/*pLexO::GUS/BD* and WT/*pLexO::GUS/BD-EMF1* seedlings at 7 DAG. RFU indicates relative

556 fluorescence units. Activity was tested in independent seedlings ( $N \geq 20$ ). In each  
 557 case, the median (segment inside rectangle), the mean (cross inside the  
 558 rectangle), upper and lower quartiles (boxes), and minimum and maximum  
 559 values (whiskers) are indicated. Significant differences as determined by  
 560 Student's t-test are indicated ( $***P < 0.001$ ). **(D)** Drawing summarizing the  
 561 histone modifying complexes recruited by VAL1 or by other EAR-containing TFs  
 562 to promote transcriptional repression.

563

564

565

566

567

568

569

570

571

572

573

574

575

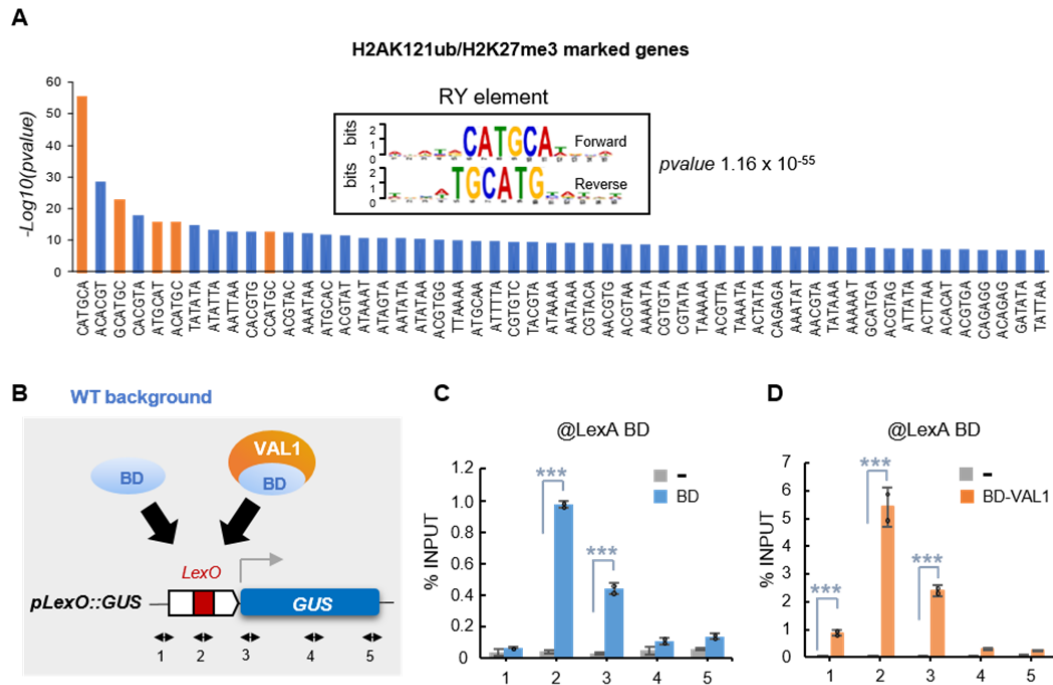

**Figure 1. LexA BD fusion proteins *in vivo* bind to the synthetic promoter. (A)** Bar chart showing RY element as the most significantly enriched cis-regulatory motif found at the proximal promoter of the H2AK121ub/H3K27me3 marked genes in WT that become upregulated in *atbmi1abc* mutant ( $n=1030$  genes; see Supplementary Dataset 1). Analysis was carried out using Tair Motif finder tool (<https://www.arabidopsis.org/tools/bulk/motiffinder/index.jsp>). Other significantly enriched 6-mer motifs are also shown. **(B)** Schematic representation of the synthetic *GUS* reporter locus. The LexO element recognized by LexA binding domain (BD) is indicated. Numbered arrows indicate the position of the primer pairs used to examine the binding of the fusion proteins to the synthetic locus. **(C,D)** Bar charts showing BD (in blue) and DB-VAL1 (in orange) enrichment at *GUS* reporter locus determined by ChIP using anti-LexA DB antibody. WT/*pLexO::GUS* plants (in grey) were used as negative control. Results are indicated as percentage of input. Error bars represent standard deviation of  $n=2-3$  biological replicates. Significant differences as determined by Student's t-test are indicated (\*\* $P < 0.001$ ).

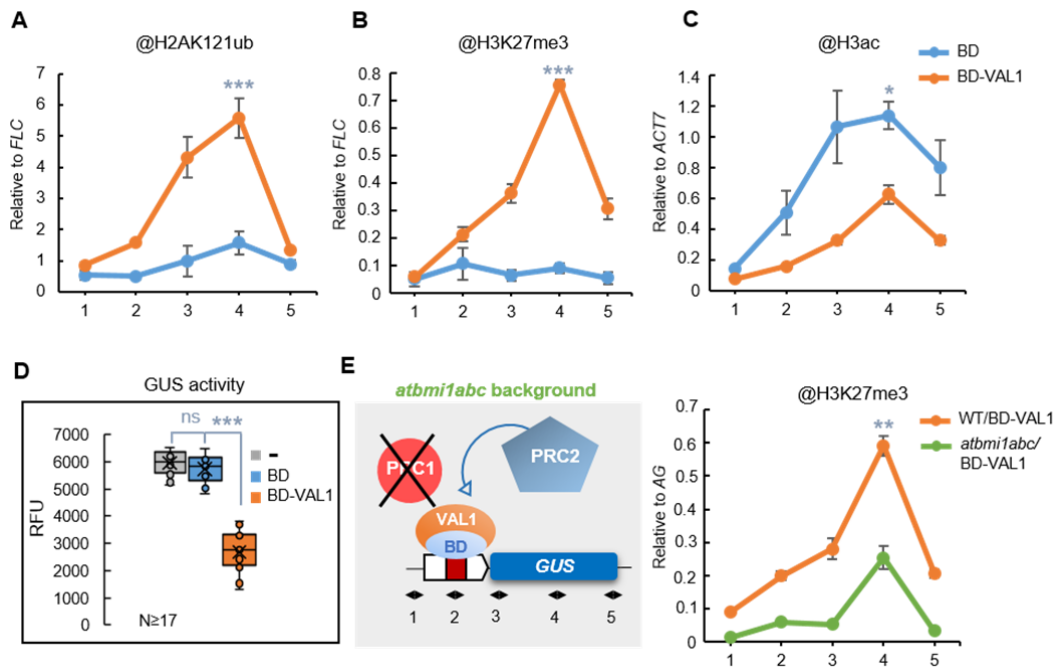

**Figure 2. VAL1 acts as a platform for PRC1, PRC2 and HDACs recruitment. (A,B,C)** H2AK121ub, H3K27me3 and H3ac levels at *GUS* reporter locus in WT/pLexO::GUS/BD and WT/pLexO::GUS/BD-VAL1 plants. Numbers at x-axis indicate the position of amplified regions as indicated in Figure 1b. H2AK121ub and H3K27me3 levels were normalized to *FLC* and H3ac levels to *ACT7*. Error bars indicate standard deviation of n=2-4 biological replicates. Significant differences at position 4 are indicated as determined by Student's t-test (\*\*P < 0.01; \*\*\*P < 0.001). **(D)** Box plots showing GUS activity levels in WT/pLexO::GUS, WT/pLexO::GUS/BD and WT/pLexO::GUS/BD-VAL1 seedlings at 7 DAG. RFU indicates relative fluorescence units. Activity was tested in independent seedlings (N≥17). In each case, the median (segment inside rectangle), the mean (cross inside the rectangle), upper and lower quartiles (boxes), and minimum and maximum values (whiskers) are indicated. Significant differences as determined by Student's t-test are indicated (\*\*\*P < 0.001). "ns" indicates not significant. **(E)** Left panel, schematic representation of the experiment showed at the right panel in which the levels of H3K27me3 at the reporter locus were compared between WT/pLexO::GUS/BD-VAL1 and *atbmi1abc*/pLexO::GUS/BD-VAL1 plants. H3K27me3 levels were normalized to *FLC*. Error bars indicate standard deviation of n=2 biological replicates. Significant difference at position 4 is indicated as determined by Student's t-test (\*\*P < 0.01).



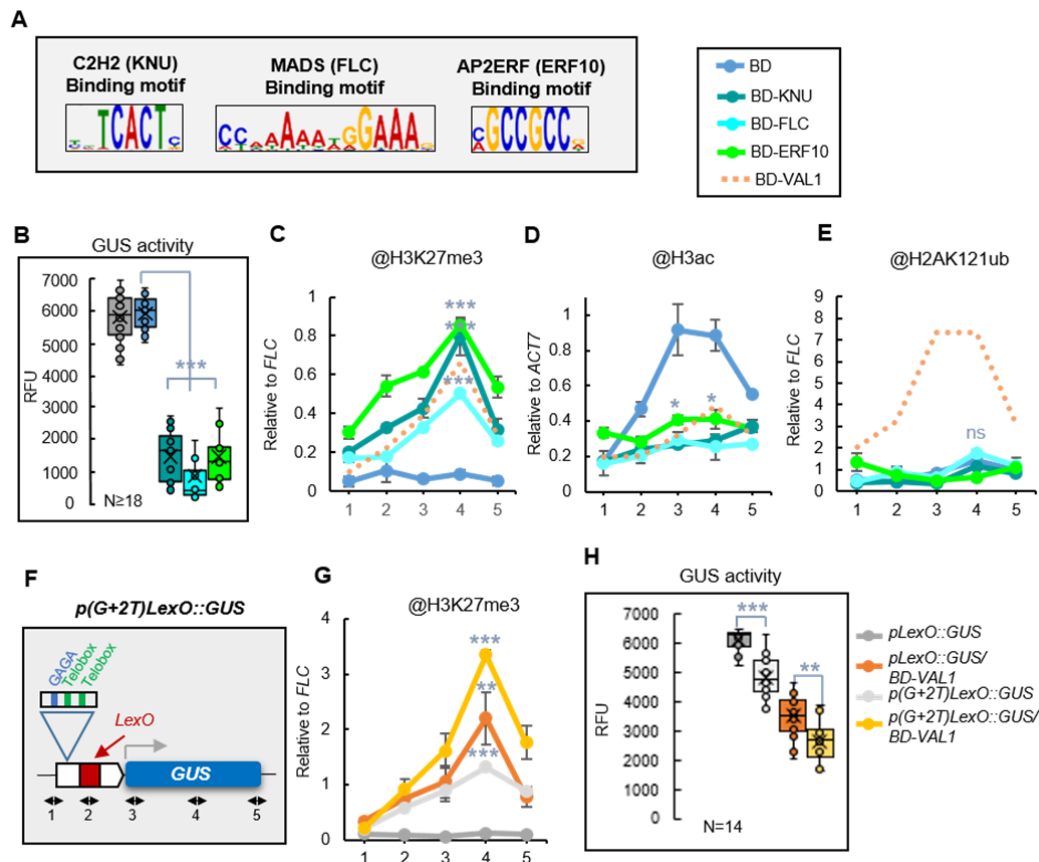

**Figure 3. BD-KNU, BD-FLC and BD-ERF10 are able to recruit PRC2 and HDACs but not PRC1.** (A) Sequence logos of the cis regulatory motifs recognized by C2H2, MADS and AP2ERF TFs. (B) Box plots showing GUS activity levels in WT/*pLexO::GUS*, WT/*pLexO::GUS/BD*, WT/*pLexO::GUS/BD-KNU*, WT/*pLexO::GUS/BD-FLC* and WT/*pLexO::GUS/BD-ERF10* seedlings at 7 DAG indicated as relative fluorescence units (RFU). Activity was tested in independent seedlings (N≥18). In each case, the median (segment inside rectangle), the mean (cross inside the rectangle), upper and lower quartiles (boxes), and minimum and maximum values (whiskers) are indicated. Significant differences as determined by Student's t-test are indicated (\*\*\*)  $P < 0.001$ . (C,D,E) H3K27me3, H3ac and H2AK121ub levels at *GUS* reporter locus in the different plants. Numbers at x-axis indicate the position of amplified regions as indicated in Figure 1b. H3K27me3 and H2AK121ub levels were normalized to *FLC*, and H3ac levels to *ACT7*. Error bars indicate standard deviation of n=2 biological replicates. Significant differences compared to WT/*pLexO::GUS/BD* are indicated as determined by Student's t-test (\*\*\*)  $P < 0.001$ ; (\*)  $P < 0.05$ . "ns" indicates not significant. One replicate of WT/*pLexO::GUS/BD-VAL1* was included as additional control. (F) Schematic representation of *p(G+2T)LexO::GUS* construct in which one GAGA and two TELOBOX motifs were inserted upstream of the LexO. (G) H3K27me3 levels at *GUS* reporter locus in WT/*pLexO::GUS* and WT/*p(G+2T)LexO::GUS* plants with and without BD-VAL1. H3K27me3 levels were normalized to *FLC*. Error bars indicate standard deviation of n=2 biological replicates. Significant differences compared to WT/*pLexO::GUS* at position 4 are indicated as determined by Student's t-test (\*\*\*)  $P < 0.001$ ; \*\*)  $P < 0.01$ . (H) Box plots showing GUS activity levels in the same plants. Activity was tested in N=14 independent seedlings. Significant differences as determined by Student's t-test are indicated (\*\*\*)  $P < 0.001$ ; \*\*)  $P < 0.01$ .

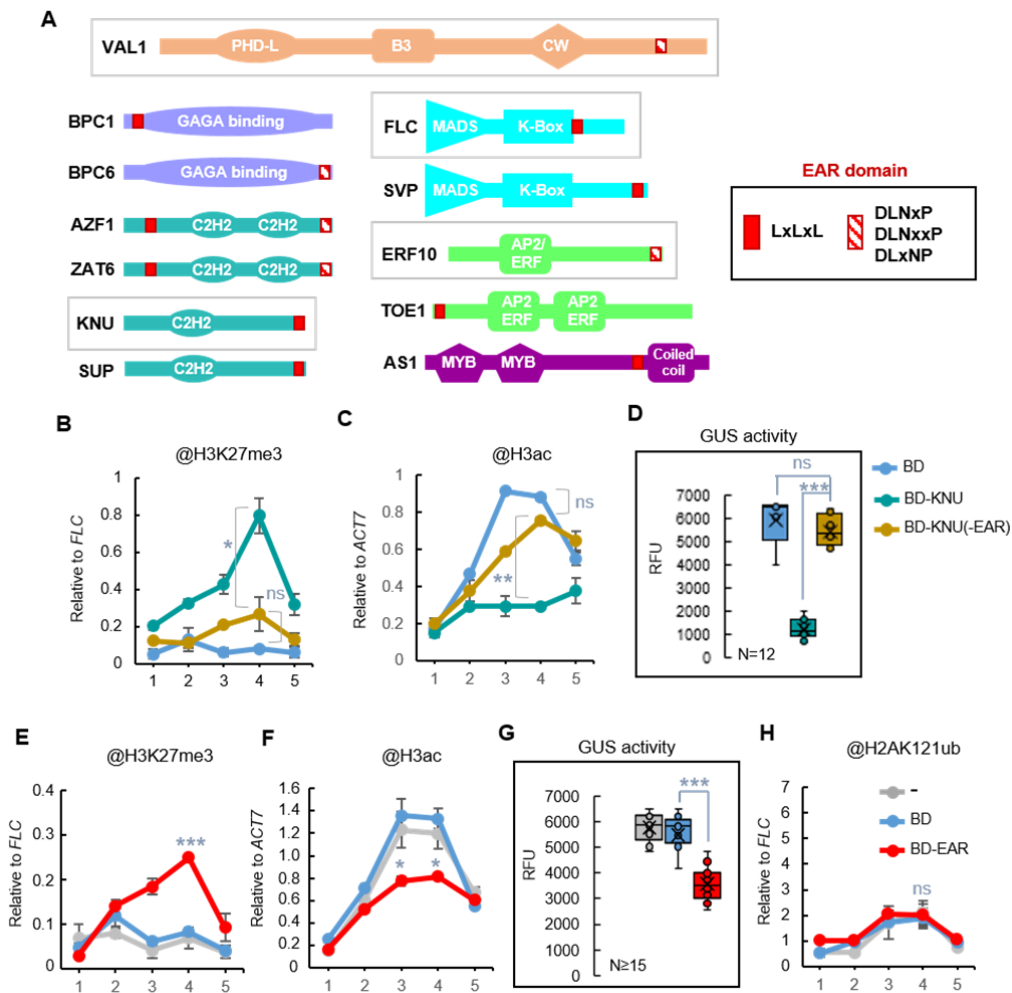

**Figure 4. EAR domain acts as an anchoring point for PRC2 and HDACs. (A)** Schematic representation of the domains present at TFs related to PRC2 recruitment. The TFs analyzed in this work are indicated. **(B,C)** Comparison of H3K27me3 and H3ac levels at *GUS* reporter locus in WT/pLexO::GUS/BD-KNU and WT/pLexO::GUS/BD-KNU(-EAR) plants. WT/pLexO::GUS/BD plants are included as control. Numbers at x-axis indicate the position of amplified regions as indicated in Figure 1b. H3K27me3 levels were normalized to *FLC* and H3ac levels to *ACT7*. Error bars indicate standard deviation of n=2 biological replicates. Significant differences at position 4 are indicated as determined by Student's t-test (\*\*P < 0.01; \*P < 0.05). **(D)** Box plots showing GUS activity levels in WT/pLexO::GUS/BD, WT/pLexO::GUS/BD-KNU and WT/pLexO::GUS/BD-KNU(-EAR) seedlings at 7 DAG indicated as relative fluorescence units (RFU). Activity was tested in independent seedlings (N≥12). The median (segment inside rectangle), the mean (cross inside the rectangle), upper and lower quartiles (boxes), and minimum and maximum values (whiskers) are indicated. Significant differences as determined by Student's t-test are indicated (\*\*\*P < 0.001). **(E,F)** Comparison of H3K27me3 and H3ac levels at *GUS* reporter locus in WT/pLexO::GUS, WT/pLexO::GUS/BD and WT/pLexO::GUS/BD-EAR plants. H3K27me3 levels were normalized to *FLC*, and H3ac levels to *ACT7*. Error bars indicate standard deviation of n=2 biological replicates. Significant differences between BD and BD-EAR are indicated as determined by Student's t-test (\*\*\*P < 0.001; \*P < 0.05). "ns" indicates not significant. **(G)** Box plots showing GUS activity levels in the same plants indicated as relative fluorescence units (RFU). Activity was tested in independent seedlings (N≥15). Significant differences as determined by Student's t-test are indicated (\*\*\*P < 0.001). **(H)** H2AK121ub levels at the reporter locus in the different plants. H2AK121ub levels were normalized to *FLC*. Error bars indicate standard deviation of n=2 biological replicates.

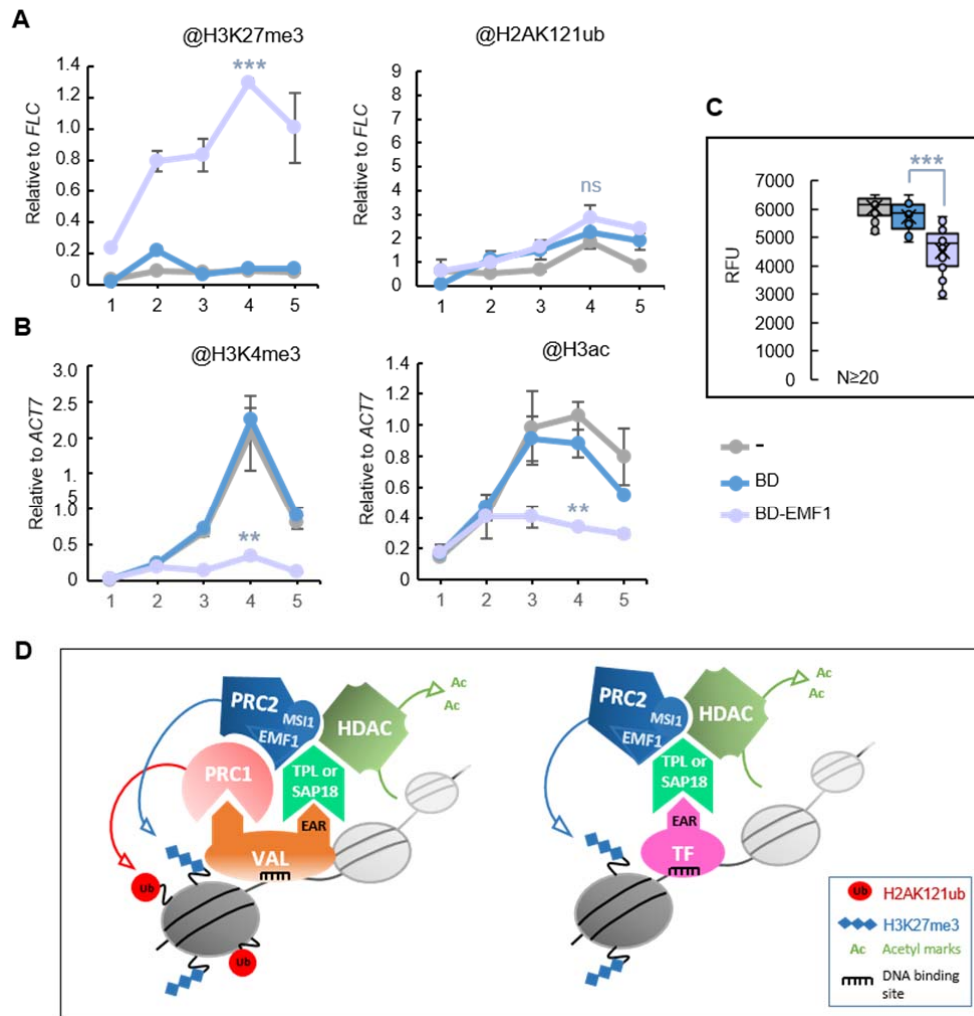

**Figure 5. EMF1 recruitment leads to the incorporation of H3K27me3 and removal of H3K4me3 and H3ac.** (A) H3K27me3 and H2AK121ub levels at *GUS* reporter locus in WT/*pLexO::GUS*, WT/*pLexO::GUS*/BD and WT/*pLexO::GUS*/BD-EMF1 plants. Numbers at x-axis indicate the position of amplified regions as indicated in Figure 1b. H2AK121ub and H3K27me3 levels were normalized to *FLC*. Error bars indicate standard deviation of n=2 biological replicates. Significant differences compared to WT/*pLexO::GUS*/BD are indicated as determined by Student's t-test (\*\*P < 0.001). "ns" indicates not significant. (B) H3K4me3 and H3ac levels at *GUS* reporter locus in the different plants. The levels were normalized to *ACT7*. Error bars indicate standard deviation of n=2 biological replicates. Significant differences between BD and BD-EMF1 are indicated as determined by Student's t-test (\*\*P < 0.01). (C) Box plots showing *GUS* activity levels in WT/*pLexO::GUS*, WT/*pLexO::GUS*/BD and WT/*pLexO::GUS*/BD-EMF1 seedlings at 7 DAG. RFU indicates relative fluorescence units. Activity was tested in independent seedlings (N≥20). In each case, the median (segment inside rectangle), the mean (cross inside the rectangle), upper and lower quartiles (boxes), and minimum and maximum values (whiskers) are indicated. Significant differences as determined by Student's t-test are indicated (\*\*P < 0.001). (D) Drawing summarizing the histone modifying complexes recruited by VAL1 or by other EAR-containing TFs to promote transcriptional repression.

## Parsed Citations

Beh, L.Y., Colwell, L.J., and Francis, N.J. (2012). A core subunit of Polycomb repressive complex 1 is broadly conserved in function but not primary sequence. *Proc. Natl. Acad. Sci. U. S. A.* 109: E1063-1071.

Pubmed: [Author and Title](#)

Google Scholar: [Author Only Title Only Author and Title](#)

Bloomer, R.H. et al. (2020). The Arabidopsis epigenetic regulator ICU11 as an accessory protein of Polycomb Repressive Complex 2. *Proc. Natl. Acad. Sci. U. S. A.* 117: 16660–16666.

Pubmed: [Author and Title](#)

Google Scholar: [Author Only Title Only Author and Title](#)

Bratzel, F., López-Torrejón, G., Koch, M., Del Pozo, J.C., and Calonje, M. (2010). Keeping cell identity in Arabidopsis requires PRC1 RING-finger homologs that catalyze H2A monoubiquitination. *Curr. Biol. CB* 20: 1853–1859.

Pubmed: [Author and Title](#)

Google Scholar: [Author Only Title Only Author and Title](#)

Calonje, M. (2014). PRC1 marks the difference in plant PcG repression. *Mol. Plant* 7: 459–471.

Pubmed: [Author and Title](#)

Google Scholar: [Author Only Title Only Author and Title](#)

Calonje, M., Sanchez, R., Chen, L., and Sung, Z.R. (2008). EMBRYONIC FLOWER1 participates in polycomb group-mediated AG gene silencing in Arabidopsis. *Plant Cell* 20: 277–291.

Pubmed: [Author and Title](#)

Google Scholar: [Author Only Title Only Author and Title](#)

Cao, R., Tsukada, Y.-I., and Zhang, Y. (2005). Role of Bmi-1 and Ring1A in H2A ubiquitylation and Hox gene silencing. *Mol. Cell* 20: 845–854.

Pubmed: [Author and Title](#)

Google Scholar: [Author Only Title Only Author and Title](#)

Causier, B., Ashworth, M., Guo, W., and Davies, B. (2012). The TOPLESS interactome: a framework for gene repression in Arabidopsis. *Plant Physiol.* 158: 423–438.

Pubmed: [Author and Title](#)

Google Scholar: [Author Only Title Only Author and Title](#)

Chen, N., Veerappan, V., Abdelmageed, H., Kang, M., and Allen, R.D. (2018). HSI2/VAL1 Silences AGL15 to Regulate the Developmental Transition from Seed Maturation to Vegetative Growth in Arabidopsis. *Plant Cell* 30: 600–619.

Pubmed: [Author and Title](#)

Google Scholar: [Author Only Title Only Author and Title](#)

Collins, J., O'Grady, K., Chen, S., and Gurley, W. (2019). The C-terminal WD40 repeats on the TOPLESS co-repressor function as a protein-protein interaction surface. *Plant Mol. Biol.* 100: 47–58.

Pubmed: [Author and Title](#)

Google Scholar: [Author Only Title Only Author and Title](#)

Costa, S. and Dean, C. (2019). Storing memories: the distinct phases of Polycomb-mediated silencing of Arabidopsis FLC. *Biochem. Soc. Trans.* 47: 1187–1196.

Pubmed: [Author and Title](#)

Google Scholar: [Author Only Title Only Author and Title](#)

Deka, B. and Singh, K.K. (2017). Multifaceted Regulation of Gene Expression by the Apoptosis- and Splicing-Associated Protein Complex and Its Components. *Int. J. Biol. Sci.* 13: 545–560.

Pubmed: [Author and Title](#)

Google Scholar: [Author Only Title Only Author and Title](#)

Derkacheva, M., Steinbach, Y., Wildhaber, T., Mozgová, I., Mahrez, W., Nanni, P., Bischof, S., Grussem, W., and Hennig, L. (2013). Arabidopsis MSI1 connects LHP1 to PRC2 complexes. *EMBO J.* 32: 2073–2085.

Pubmed: [Author and Title](#)

Google Scholar: [Author Only Title Only Author and Title](#)

Ezer, D., Shepherd, S.J.K., Brestovitsky, A., Dickinson, P., Cortijo, S., Charoensawan, V., Box, M.S., Biswas, S., Jaeger, K.E., and Wigge, P.A. (2017). The G-Box Transcriptional Regulatory Code in Arabidopsis. *Plant Physiol.* 175: 628–640.

Pubmed: [Author and Title](#)

Google Scholar: [Author Only Title Only Author and Title](#)

Halder, V. and Kombrink, E. (2015). Facile high-throughput forward chemical genetic screening by in situ monitoring of glucuronidase-based reporter gene expression in Arabidopsis thaliana. *Front. Plant Sci.* 6: 13.

Pubmed: [Author and Title](#)

Google Scholar: [Author Only Title Only Author and Title](#)

Hecker, A., Brand, L.H., Peter, S., Simoncello, N., Kilian, J., Harter, K., Gaudin, V., and Wanke, D. (2015a). The Arabidopsis GAGA-Binding Factor BASIC PENTACYSTEINE6 Recruits the POLYCOMB-REPRESSIVE COMPLEX1 Component LIKE HETEROCHROMATIN PROTEIN1 to GAGA DNA Motifs. *Plant Physiol.* 168: 1013–1024.

Pubmed: [Author and Title](#)

Google Scholar: [Author Only Title Only Author and Title](#)

**Hecker, A., Brand, L.H., Peter, S., Simoncello, N., Kilian, J., Harter, K., Gaudin, V., and Wanke, D. (2015b). The Arabidopsis GAGA-Binding Factor BASIC PENTACYSTEINE6 Recruits the POLYCOMB-REPRESSIVE COMPLEX1 Component LIKE HETEROCHROMATIN PROTEIN1 to GAGA DNA Motifs. Plant Physiol. 168: 1013–1024.**

Pubmed: [Author and Title](#)

Google Scholar: [Author Only Title Only Author and Title](#)

**Hoppmann, V., Thorstensen, T., Kristiansen, P.E., Veiseth, S.V., Rahman, M.A., Finne, K., Aalen, R.B., and Aasland, R. (2011). The CW domain, a new histone recognition module in chromatin proteins. EMBO J. 30: 1939–1952.**

Pubmed: [Author and Title](#)

Google Scholar: [Author Only Title Only Author and Title](#)

**Jing, Y., Guo, Q., and Lin, R. (2019). The B3-Domain Transcription Factor VAL1 Regulates the Floral Transition by Repressing FLOWERING LOCUS T. Plant Physiol. 181: 236–248.**

Pubmed: [Author and Title](#)

Google Scholar: [Author Only Title Only Author and Title](#)

**Kagale, S., Links, M.G., and Rozwadowski, K. (2010). Genome-wide analysis of ethylene-responsive element binding factor-associated amphiphilic repression motif-containing transcriptional regulators in Arabidopsis. Plant Physiol. 152: 1109–1134.**

Pubmed: [Author and Title](#)

Google Scholar: [Author Only Title Only Author and Title](#)

**Kagale, S. and Rozwadowski, K. (2011). EAR motif-mediated transcriptional repression in plants: an underlying mechanism for epigenetic regulation of gene expression. Epigenetics 6: 141–146.**

Pubmed: [Author and Title](#)

Google Scholar: [Author Only Title Only Author and Title](#)

**Ke, J., Ma, H., Gu, X., Thelen, A., Brunzelle, J.S., Li, J., Xu, H.E., and Melcher, K. (2015). Structural basis for recognition of diverse transcriptional repressors by the TOPLESS family of corepressors. Sci. Adv. 1: e1500107.**

Pubmed: [Author and Title](#)

Google Scholar: [Author Only Title Only Author and Title](#)

**Kim, S.Y., Lee, J., Eshed-Williams, L., Zilberman, D., and Sung, Z.R. (2012). EMF1 and PRC2 cooperate to repress key regulators of Arabidopsis development. PLoS Genet. 8: e1002512.**

Pubmed: [Author and Title](#)

Google Scholar: [Author Only Title Only Author and Title](#)

**Laprell, F., Finkl, K., and Müller, J. (2017). Propagation of Polycomb-repressed chromatin requires sequence-specific recruitment to DNA. Science 356: 85–88.**

Pubmed: [Author and Title](#)

Google Scholar: [Author Only Title Only Author and Title](#)

**Li, Z., Fu, X., Wang, Y., Liu, R., and He, Y. (2018). Polycomb-mediated gene silencing by the BAH-EMF1 complex in plants. Nat. Genet. 50: 1254–1261.**

Pubmed: [Author and Title](#)

Google Scholar: [Author Only Title Only Author and Title](#)

**Liang, S.C. et al. (2015). Kicking against the PRCs - A Domesticated Transposase Antagonises Silencing Mediated by Polycomb Group Proteins and Is an Accessory Component of Polycomb Repressive Complex 2. PLoS Genet. 11: e1005660.**

Pubmed: [Author and Title](#)

Google Scholar: [Author Only Title Only Author and Title](#)

**Liu, X., Yang, S., Zhao, M., Luo, M., Yu, C.-W., Chen, C.-Y., Tai, R., and Wu, K. (2014). Transcriptional repression by histone deacetylases in plants. Mol. Plant 7: 764–772.**

Pubmed: [Author and Title](#)

Google Scholar: [Author Only Title Only Author and Title](#)

**Lodha, M., Marco, C.F., and Timmermans, M.C.P. (2013). The ASYMMETRIC LEAVES complex maintains repression of KNOX homeobox genes via direct recruitment of Polycomb-repressive complex2. Genes Dev. 27: 596–601.**

Pubmed: [Author and Title](#)

Google Scholar: [Author Only Title Only Author and Title](#)

**Makarevich, G., Leroy, O., Akinci, U., Schubert, D., Clarenz, O., Goodrich, J., Grossniklaus, U., and Köhler, C. (2006). Different Polycomb group complexes regulate common target genes in Arabidopsis. EMBO Rep. 7: 947–952.**

Pubmed: [Author and Title](#)

Google Scholar: [Author Only Title Only Author and Title](#)

**Mehdi, S., Derkacheva, M., Ramström, M., Kralemann, L., Bergquist, J., and Hennig, L. (2016). The WD40 Domain Protein MSI1 Functions in a Histone Deacetylase Complex to Fine-Tune Abscissic Acid Signaling. Plant Cell 28: 42–54.**

Pubmed: [Author and Title](#)

Google Scholar: [Author Only Title Only Author and Title](#)

**Mendenhall, E.M., Koche, R.P., Truong, T., Zhou, V.W., Issac, B., Chi, A.S., Ku, M., and Bernstein, B.E. (2010). GC-rich sequence**



**elements recruit PRC2 in mammalian ES cells. PLoS Genet. 6: e1001244.**

Pubmed: [Author and Title](#)

Google Scholar: [Author Only Title Only Author and Title](#)

**Merini, W. and Calonje, M. (2015). PRC1 is taking the lead in PcG repression. Plant J. Cell Mol. Biol.**

Pubmed: [Author and Title](#)

Google Scholar: [Author Only Title Only Author and Title](#)

**Mozgova, I. and Hennig, L. (2015). The polycomb group protein regulatory network. Annu. Rev. Plant Biol. 66: 269–296.**

Pubmed: [Author and Title](#)

Google Scholar: [Author Only Title Only Author and Title](#)

**Mozgova, I., Köhler, C., and Hennig, L. (2015). Keeping the gate closed: functions of the polycomb repressive complex PRC2 in development. Plant J. Cell Mol. Biol. 83: 121–132.**

Pubmed: [Author and Title](#)

Google Scholar: [Author Only Title Only Author and Title](#)

**Müller, J., Hart, C.M., Francis, N.J., Vargas, M.L., Sengupta, A., Wild, B., Miller, E.L., O'Connor, M.B., Kingston, R.E., and Simon, J.A (2002). Histone methyltransferase activity of a Drosophila Polycomb group repressor complex. Cell 111: 197–208.**

Pubmed: [Author and Title](#)

Google Scholar: [Author Only Title Only Author and Title](#)

**Müller, J. and Kassis, J.A (2006). Polycomb response elements and targeting of Polycomb group proteins in Drosophila. Curr. Opin. Genet. Dev. 16: 476–484.**

Pubmed: [Author and Title](#)

Google Scholar: [Author Only Title Only Author and Title](#)

**Ning, Y.-Q., Chen, Q., Lin, R.-N., Li, Y.-Q., Li, L., Chen, S., and He, X.-J. (2019). The HDA19 histone deacetylase complex is involved in the regulation of flowering time in a photoperiod-dependent manner. Plant J. Cell Mol. Biol. 98: 448–464.**

Pubmed: [Author and Title](#)

Google Scholar: [Author Only Title Only Author and Title](#)

**Qüesta, J.I., Antoniou-Kourounioti, R.L., Rosa, S., Li, P., Duncan, S., Whittaker, C., Howard, M., and Dean, C. (2020). Noncoding SNPs influence a distinct phase of Polycomb silencing to destabilize long-term epigenetic memory at Arabidopsis FLC. Genes Dev. 34: 446–461.**

Pubmed: [Author and Title](#)

Google Scholar: [Author Only Title Only Author and Title](#)

**Qüesta, J.I., Song, J., Geraldo, N., An, H., and Dean, C. (2016). Arabidopsis transcriptional repressor VAL1 triggers Polycomb silencing at FLC during vernalization. Science 353: 485–488.**

Pubmed: [Author and Title](#)

Google Scholar: [Author Only Title Only Author and Title](#)

**Richter, R., Kinoshita, A., Vincent, C., Martinez-Gallegos, R., Gao, H., van Driel, A.D., Hyun, Y., Mateos, J.L., and Coupland, G. (2019). Floral regulators FLC and SOC1 directly regulate expression of the B3-type transcription factor TARGET OF FLC AND SVP 1 at the Arabidopsis shoot apex via antagonistic chromatin modifications. PLoS Genet. 15: e1008065.**

Pubmed: [Author and Title](#)

Google Scholar: [Author Only Title Only Author and Title](#)

**Ringrose, L. and Paro, R. (2004). Epigenetic regulation of cellular memory by the Polycomb and Trithorax group proteins. Annu. Rev. Genet. 38: 413–443.**

Pubmed: [Author and Title](#)

Google Scholar: [Author Only Title Only Author and Title](#)

**Sanchez-Pulido, L., Devos, D., Sung, Z.R., and Calonje, M. (2008). RAWUL: a new ubiquitin-like domain in PRC1 ring finger proteins that unveils putative plant and worm PRC1 orthologs. BMC Genomics 9: 308.**

Pubmed: [Author and Title](#)

Google Scholar: [Author Only Title Only Author and Title](#)

**Song, C.-P. and Galbraith, D.W. (2006). AtSAP18, an orthologue of human SAP18, is involved in the regulation of salt stress and mediates transcriptional repression in Arabidopsis. Plant Mol. Biol. 60: 241–257.**

Pubmed: [Author and Title](#)

Google Scholar: [Author Only Title Only Author and Title](#)

**Sun, B., Zhou, Y., Cai, J., Shang, E., Yamaguchi, N., Xiao, J., Looi, L.-S., Wee, W.-Y., Gao, X., Wagner, D., and Ito, T. (2019). Integration of Transcriptional Repression and Polycomb-Mediated Silencing of WUSCHEL in Floral Meristems. Plant Cell 31: 1488–1505.**

Pubmed: [Author and Title](#)

Google Scholar: [Author Only Title Only Author and Title](#)

**Suzuki, M. and McCarty, D.R. (2008). Functional symmetry of the B3 network controlling seed development. Curr. Opin. Plant Biol. 11: 548–553.**

Pubmed: [Author and Title](#)

Google Scholar: [Author Only Title Only Author and Title](#)

**Suzuki, M., Wang, H.H.-Y., and McCarty, D.R. (2007). Repression of the LEAFY COTYLEDON 1/B3 regulatory network in plant embryo**

**development by VP1/ABSCISIC ACID INSENSITIVE 3-LIKE B3 genes.** *Plant Physiol.* 143: 902–911.

Pubmed: [Author and Title](#)

Google Scholar: [Author Only Title Only Author and Title](#)

**Wang, H., Wang, L., Erdjument-Bromage, H., Vidal, M., Tempst, P., Jones, R.S., and Zhang, Y. (2004). Role of histone H2A ubiquitination in Polycomb silencing.** *Nature* 431: 873–878.

Pubmed: [Author and Title](#)

Google Scholar: [Author Only Title Only Author and Title](#)

**Wang, Y., Gu, X., Yuan, W., Schmitz, R.J., and He, Y. (2014). Photoperiodic control of the floral transition through a distinct polycomb repressive complex.** *Dev. Cell* 28: 727–736.

Pubmed: [Author and Title](#)

Google Scholar: [Author Only Title Only Author and Title](#)

**Xiao, J. et al. (2017). Cis and trans determinants of epigenetic silencing by Polycomb repressive complex 2 in Arabidopsis.** *Nat. Genet.* 49: 1546–1552.

Pubmed: [Author and Title](#)

Google Scholar: [Author Only Title Only Author and Title](#)

**Xu, Y. et al. (2018). SUPERMAN regulates floral whorl boundaries through control of auxin biosynthesis.** *EMBO J.* 37.

Pubmed: [Author and Title](#)

Google Scholar: [Author Only Title Only Author and Title](#)

**Yang, C., Bratzel, F., Hohmann, N., Koch, M., Turck, F., and Calonje, M. (2013). VAL- and AtBMI1-mediated H2Aub initiate the switch from embryonic to postgerminative growth in Arabidopsis.** *Curr. Biol. CB* 23: 1324–1329.

Pubmed: [Author and Title](#)

Google Scholar: [Author Only Title Only Author and Title](#)

**Yuan, W., Luo, X., Li, Z., Yang, W., Wang, Y., Liu, R., Du, J., and He, Y. (2016). A cis cold memory element and a trans epigenome reader mediate Polycomb silencing of FLC by vernalization in Arabidopsis.** *Nat. Genet.* 48: 1527–1534.

Pubmed: [Author and Title](#)

Google Scholar: [Author Only Title Only Author and Title](#)

**Zeng, X., Gao, Z., Jiang, C., Yang, Y., Liu, R., and He, Y. (2020). HISTONE DEACETYLASE 9 Functions with Polycomb Silencing to Repress FLOWERING LOCUS C Expression.** *Plant Physiol.* 182: 555–565.

Pubmed: [Author and Title](#)

Google Scholar: [Author Only Title Only Author and Title](#)

**Zhang, Y., Iratni, R., Erdjument-Bromage, H., Tempst, P., and Reinberg, D. (1997). Histone deacetylases and SAP18, a novel polypeptide, are components of a human Sin3 complex.** *Cell* 89: 357–364.

Pubmed: [Author and Title](#)

Google Scholar: [Author Only Title Only Author and Title](#)

**Zhou, Y. et al. (2013). HISTONE DEACETYLASE19 interacts with HSL1 and participates in the repression of seed maturation genes in Arabidopsis seedlings.** *Plant Cell* 25: 134–148.

Pubmed: [Author and Title](#)

Google Scholar: [Author Only Title Only Author and Title](#)

**Zhou, Y., Romero-Campero, F.J., Gómez-Zambrano, Á., Turck, F., and Calonje, M. (2017). H2A monoubiquitination in Arabidopsis thaliana is generally independent of LHP1 and PRC2 activity.** *Genome Biol.* 18: 69.

Pubmed: [Author and Title](#)

Google Scholar: [Author Only Title Only Author and Title](#)

**Zhou, Y., Wang, Y., Krause, K., Yang, T., Dongus, J.A., Zhang, Y., and Turck, F. (2018). Telobox motifs recruit CLF/SWN-PRC2 for H3K27me3 deposition via TRB factors in Arabidopsis.** *Nat. Genet.* 50: 638–644.

Pubmed: [Author and Title](#)

Google Scholar: [Author Only Title Only Author and Title](#)

**Zuo, J., Niu, Q.W., and Chua, N.H. (2000). Technical advance: An estrogen receptor-based transactivator XVE mediates highly inducible gene expression in transgenic plants.** *Plant J. Cell Mol. Biol.* 24: 265–273.

Pubmed: [Author and Title](#)

Google Scholar: [Author Only Title Only Author and Title](#)
